# Supplementary material for: Formation of banded spherulites and the temperature dependence of the band space in olefin block copolymer
Source: Royal Society of Chemistry journal article supplement (doi:10.1039/c5ra04556h), 2015-01-01
Supplement: c5ra04556h1.pdf [file c5ra04556h1.pdf]

*Supplementary Information for*

## **Formation of banded spherulites and temperature dependence of band space in olefin block copolymer**

Qinglong Zhang, Jiashu Fan, Jiachun Feng\*

*State Key Laboratory of Molecular Engineering of Polymers, Collaborative Innovation Center of Polymers and Polymer Composite Materials, Department of Macromolecular Science, Fudan University, Shanghai 200433, China*

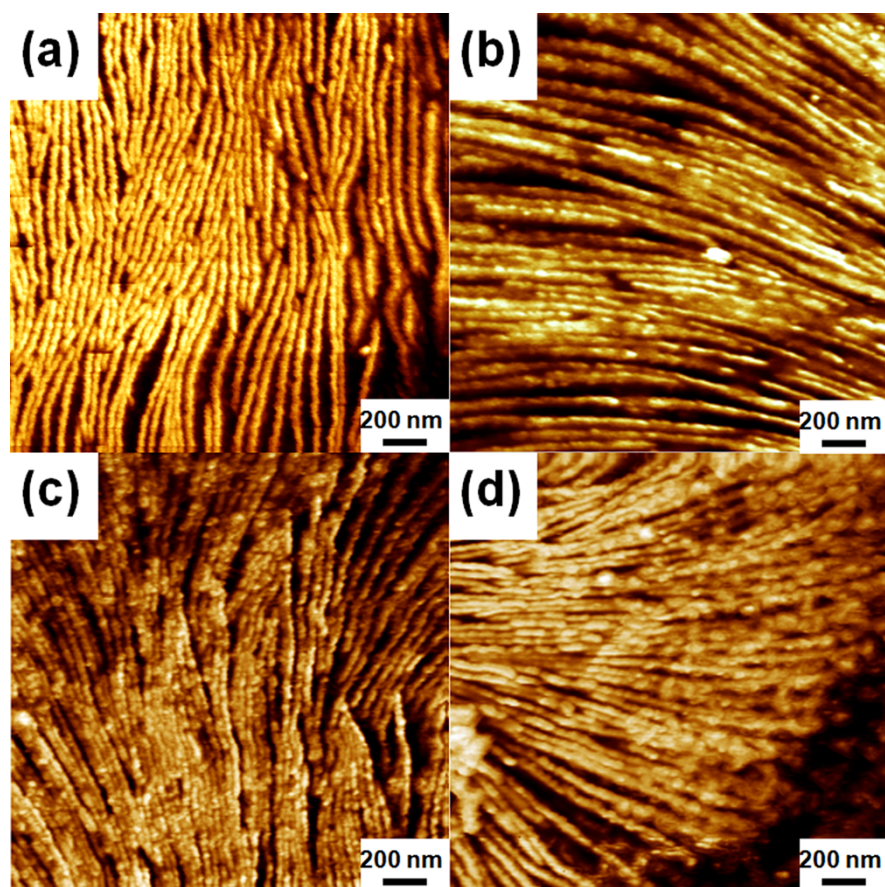

**Fig. S1** AFM micrographs of OBC isothermally crystallized at 120 °C in different regions.

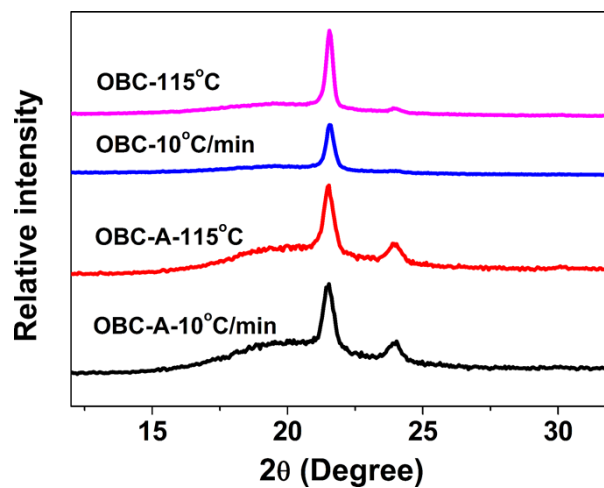

**Fig. S2.** Selected WAXD patterns of OBC and OBC-A nonisothermally crystallized at 10 °C/min and isothermally crystallized at 115 °C.
